# Supplementary material for: Fe incorporation-induced electronic modification of Co-tannic acid complex nanoflowers for high-performance water oxidation
Source: Royal Society of Chemistry journal article supplement (doi:10.1039/d1qi01630j), 2022-01-01
Supplement: d1qi01630j1.pdf [file d1qi01630j1.pdf]

**Fe incorporation-induced electronic modification of Co-tannic acid complex nanoflowers for high-performance water oxidation**

Guangyao Zhou,<sup>‡a,b</sup> Yaru Ma,<sup>‡b,c</sup> Chengjun Gu,<sup>b</sup> Jun Yang,<sup>d</sup> Huan Pang,<sup>e</sup> Jing Li,<sup>\*a</sup> Lin Xu,<sup>\*b</sup> and Yawen Tang<sup>\*b</sup>

<sup>a</sup> College of Science, Jinling Institute of Technology, Nanjing 210023, PR China

Email: lijing@jit.edu.cn

<sup>b</sup> Jiangsu Key Laboratory of New Power Batteries, Jiangsu Collaborative Innovation Centre of Biomedical Functional Materials, School of Chemistry and Materials Science, Nanjing Normal University, Nanjing 210023, PR China

Email: xulin001@njnu.edu.cn; tangyawen@njnu.edu.cn

<sup>c</sup> Shandong Academy of Pharmaceutical Sciences, Jinan 250101, PR China

<sup>d</sup> State Key Laboratory of Multiphase Complex Systems and Center of Mesoscience, Institute of Process Engineering, Chinese Academy of Sciences, Beijing 100190, PR China; Nanjing IPE Institute of Green Manufacturing Industry, Nanjing 211100, PR China

<sup>e</sup> School of Chemistry and Chemical Engineering, Yangzhou University, Yangzhou 225009, PR China

<sup>‡</sup> Guangyao Zhou and Yaru Ma contributed equally to this work.

## Experimental section

### 1. Reagents and chemicals

Tannic acid (TA), NaOH,  $\text{Co}(\text{NO}_3)_2 \cdot 6\text{H}_2\text{O}$  and  $\text{Fe}(\text{NO}_3)_3 \cdot 9\text{H}_2\text{O}$  were supplied by Aladdin Chemistry Co., Ltd (Shanghai, China). Commercial  $\text{RuO}_2$  was purchased from Johnson Matthey Chemicals Ltd (Shanghai, China). All reagents were of analytical reagent grade and used without further purification.

### 2. Synthesis of $\text{Fe}_{0.15}\text{Co}_{0.85}\text{-TA}$

In a typical synthesis, 8.5 g of tannic acid was firstly dispersed into NaOH solution under constant stirring to obtain  $0.02 \text{ mol L}^{-1}$  sodium tannate solution. Subsequently, 4.2 mmol of  $\text{Co}(\text{NO}_3)_2 \cdot 6\text{H}_2\text{O}$  and 1.4 mmol of  $\text{Fe}(\text{NO}_3)_3 \cdot 9\text{H}_2\text{O}$  were added into 35 mL of the above sodium tannate solution with vigorous stirring for 30 min. Afterwards, the resultant solution was transferred into a 50 mL stainless Teflon-lined autoclave and heated at  $120 \text{ }^\circ\text{C}$  for 6 h. Finally, the  $\text{Fe}_{0.15}\text{Co}_{0.85}\text{-TA}$  sample was obtained by centrifugation, washed with water and absolute ethanol for several times and dried at  $40 \text{ }^\circ\text{C}$  for 12 h. For comparison,  $\text{Fe}_{0.1}\text{Co}_{0.9}\text{-TA}$ ,  $\text{Fe}_{0.24}\text{Co}_{0.76}\text{-TA}$ , Fe-TA and Co-TA samples were also synthesized under the identical synthetic procedure except varying the Co/Fe feeding mole ratios of 4/1, 3/1, 2/1, 1/0, and 0/1, respectively.

### 3. Physicochemical characterizations

The morphology and structure of samples were examined by transmission electron microscopy (TEM, JEOL JEM-2100F, 200 kV) and scanning electron microscopy (SEM, Hitachi S-4800). The crystallinity of the products was analyzed by X-ray diffraction (XRD) patterns on a Model D/max-rC X-ray diffractometer with a  $\text{Cu K}\alpha$

radiation source ( $\lambda = 1.5406 \text{ \AA}$ ). The surface chemistry state of samples was identified by X-ray photoelectron spectroscopy (XPS) using a Thermo VG Scientific ESCALAB 250 spectrometer with an Al K $\alpha$  radiator. The BET specific surface area was measured at 77 K on a Micromeritics ASAP 2050 system. Raman spectrum was recorded on a Raman spectrometer (LabRAMHR800,  $\lambda = 514 \text{ nm}$ ). FT-IR spectroscopy was carried out with a Nicolet 520 SXFTIR spectrometer. The electron spin resonance (ESR) test were conducted using an ECS 106 ESR spectrometer (Bruker, Rheinstetten, Germany) with an X-band resonator (ER 4103TM). All ICP measurements were carried out on an IRIS Intrepid instrument (Thermo Fisher, USA).

#### 4. *Electrochemical measurement*

All electrochemical tests were performed on a CHI 760E electrochemical workstation in 1.0 M KOH solution using a standard three-electrode system with a glassy carbon electrode (GCE) as working electrode, a graphite rod as counter electrode, and a saturated calomel reference electrode (SCE) as the reference electrode. For the preparation of the working electrode, 5 mg of the as-synthesized Fe<sub>x</sub>Co<sub>1-x</sub>-TA family catalysts were dispersed into 1 mL of ethanol solution (the volume ratio of ethanol to water is 1:3) for at least 30 min under ultrasonication to form a catalyst ink. Then, 8  $\mu\text{L}$  of the obtained ink was dropped on the surface of polished GCE and then dried at 40 °C. Subsequently, 4  $\mu\text{L}$  of Nafion (5 wt.%, Sigma-Aldrich) was dropped on the surface of catalysts modified GCE and then dried before electrochemical test. Linear sweep voltammetry (LSV) were carried out with a scan rate of 5 mV s<sup>-1</sup> and manually *iR*-corrected. The electrochemical double-layer capacitances ( $C_{dl}$ ) were determined by

a series of CV tests obtained in the non-Faradaic region (1.02 - 1.12 V) at different scan rates (20 - 100 mV s<sup>-1</sup>). The stability measurements were investigated by the chronoamperometry test performed at a constant potential of 1.5 V and the continuous CV scanning 2000 cycles at a scan rate of 0.1 V s<sup>-1</sup>. In this work, all potentials were calibrated to reversible hydrogen electrode (RHE). The equation of potential conversion from SCE to RHE was described as follows:  $E_{\text{RHE}} = E_{\text{SCE}} + 0.0591 \text{ pH} + 0.242$ .

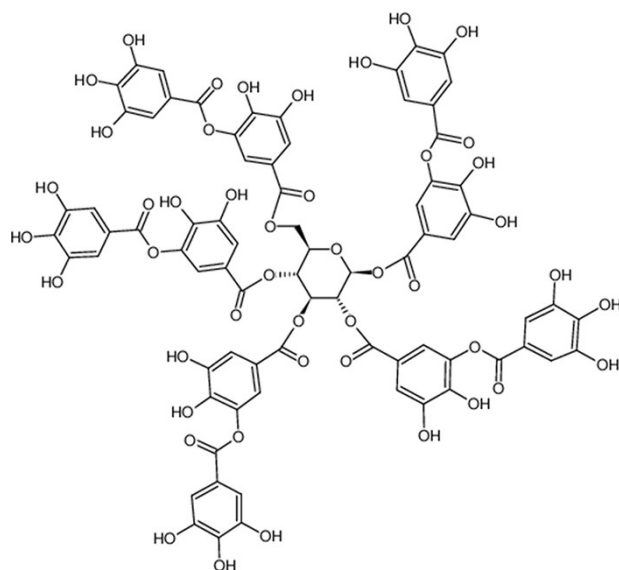

Figure S1 The molecule structure of tannic acid (TA).

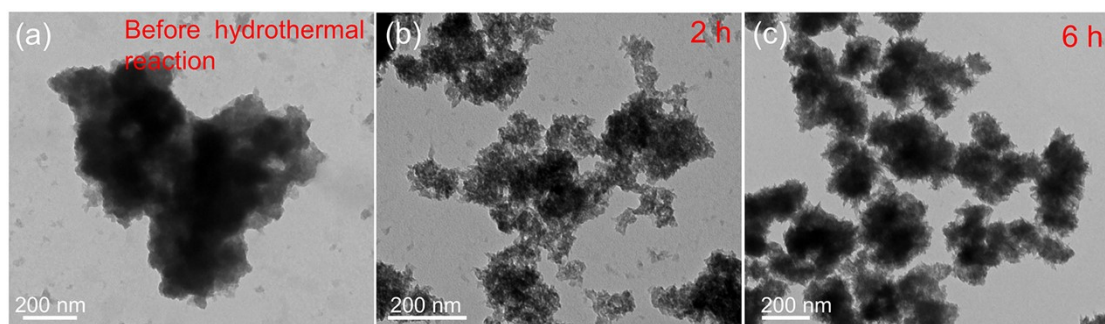

Figure S2 TEM images of Fe<sub>0.15</sub>Co<sub>0.85</sub>-TA intermediates collected at different reaction time: (a) before hydrothermal reaction, (b) 2 h and (c) 6 h.

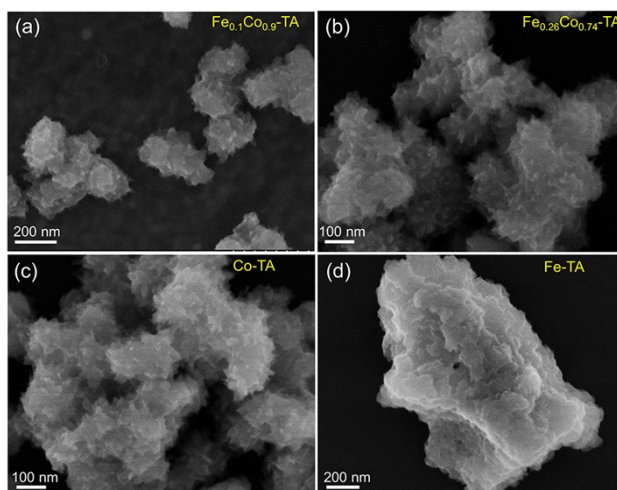

Figure S3 SEM images of different contrastive samples. (a) Fe<sub>0.1</sub>Co<sub>0.9</sub>-TA, (b) Fe<sub>0.24</sub>Co<sub>0.76</sub>-TA, (c) Co-TA and (d) Fe-TA.

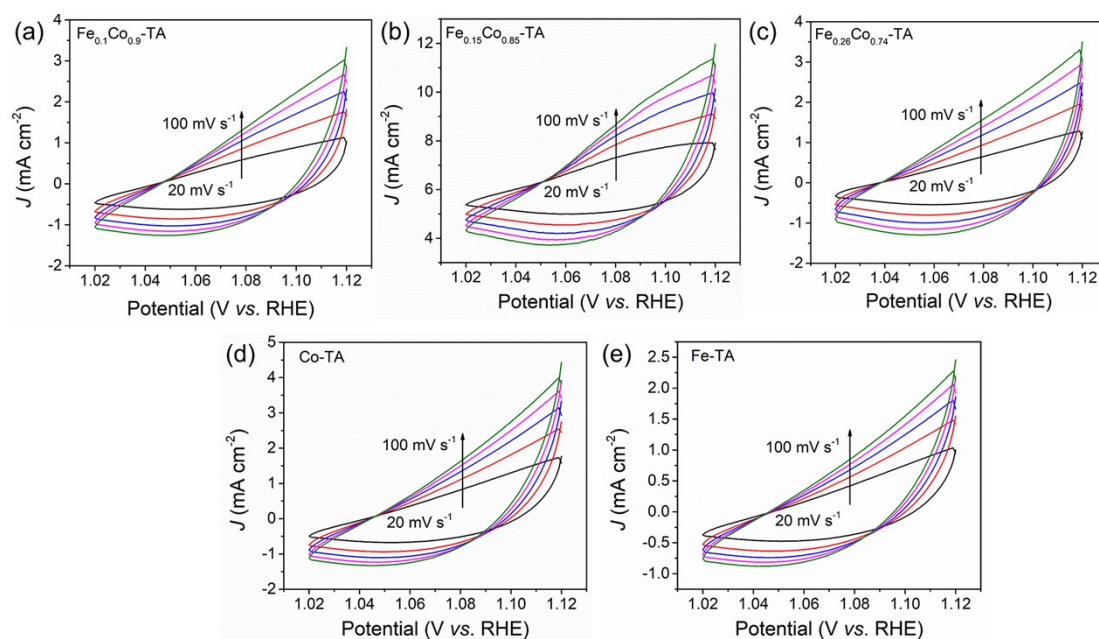

Figure S4 CV curves of the synthesized Fe<sub>x</sub>Co<sub>(1-x)</sub>-TA catalysts in the non-Faradaic region (1.02 – 1.12 V) obtained at different scanning rates. (a) Fe<sub>0.1</sub>Co<sub>0.9</sub>-TA, (b) Fe<sub>0.15</sub>Co<sub>0.85</sub>-TA, (c) Fe<sub>0.24</sub>Co<sub>0.76</sub>-TA, (d) Co-TA and (e) Fe-TA.

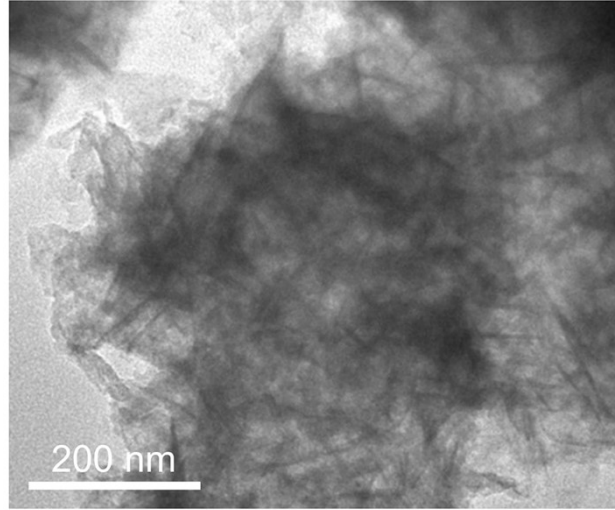

Figure S5 TEM image of the Fe<sub>0.15</sub>Co<sub>0.85</sub>-TA after OER test.

Table S1 Determinations of the content of Fe and Co in  $\text{Fe}_x\text{Co}_{(1-x)}\text{-TA}$  by ICP-OES.

| Feed mole ratios (Co/Fe) | Co (at. %) in $\text{Fe}_x\text{Co}_{(1-x)}\text{-TA}$ | Fe (at. %) in $\text{Fe}_x\text{Co}_{(1-x)}\text{-TA}$ |
|--------------------------|--------------------------------------------------------|--------------------------------------------------------|
| 4/1                      | 0.90                                                   | 0.10                                                   |
| 3/1                      | 0.85                                                   | 0.15                                                   |
| 2/1                      | 0.74                                                   | 0.26                                                   |



Table S2 Comparison of OER performance of Fe<sub>0.15</sub>Co<sub>0.85</sub>-TA nanoflowers with some previously reported Co-based catalysts in 1.0 M KOH solution.

| Catalysts                                                    | Overpotential at<br>10 mA cm <sup>-2</sup> (mV) | Tafel slope<br>(mV dec <sup>-1</sup> ) | References                                            |
|--------------------------------------------------------------|-------------------------------------------------|----------------------------------------|-------------------------------------------------------|
| <b>Fe<sub>0.15</sub>Co<sub>0.85</sub>-TA<br/>nanoflowers</b> | <b>272</b>                                      | <b>53.9</b>                            | <b>This work</b>                                      |
| NPMC/CoFe                                                    | 310                                             | 50.6                                   | <i>J. Power Sources</i> , 2019, 441, 227177.          |
| Co <sub>3</sub> O <sub>4</sub> -CNTs                         | 370                                             | 87                                     | <i>Appl. Surf. Sci.</i> , 2019, 497, 143818.          |
| CoFe@NiFe-200/NF                                             | 190                                             | 45.71                                  | <i>Appl. Catal. B: Environ.</i> , 2019, 253, 131.     |
| IrClx-Co(OH) <sub>2</sub> /CNTs                              | 230                                             | 71.64                                  | <i>Appl. Catal. B: Environ.</i> , 2020, 279, 119398.  |
| N-NiCoPx/NCF                                                 | 298                                             | 60                                     | <i>Chem. Eng. J.</i> , 2020, 402, 126257.             |
| Fe-CoNi-OH                                                   | 210                                             | 28                                     | <i>Chem. Eng. J.</i> , 2021, 403, 126304.             |
| Co <sub>0.8</sub> Fe <sub>0.2</sub> P                        | 240                                             | 55                                     | <i>ACS Appl. Mater. Interfaces</i> , 2020, 12, 46578. |
| (Fe,Co)SPPc-900-sp                                           | 353                                             | 53                                     | <i>ACS Sustainable Chem. Eng.</i> , 2020, 8, 13147.   |
| Fe-Co <sub>3</sub> O <sub>4</sub>                            | 262                                             | 43                                     | <i>Adv. Mater.</i> , 2020, 32, 2002235.               |
| Ni-Co-P/GDY                                                  | 290                                             | 72.7                                   | <i>ChemCatChem</i> 2019, 11, 5407.                    |
| Co@LCO-NFs                                                   | 270                                             | 43                                     | <i>J. Mater. Chem. A</i> , 2020, 8, 19946.            |
| CoFe@NC-700                                                  | 470                                             | 135.7                                  | <i>Mater. Res. Express</i> , 2020, 7, 085002.         |
| Co/N-CNTs                                                    | 310                                             | 66                                     | <i>Small</i> , 2020, 16, 2002427.                     |
| Co <sub>9</sub> S <sub>8</sub>                               | 288                                             | 79                                     | <i>J. Mater. Chem. A</i> , 2018, 6, 7592.             |
| CoS <sub>2</sub> HNSs                                        | 290                                             | 57                                     | <i>Nanoscale</i> , 2018, 10, 4816.                    |
| Fe-SAs/Fe <sub>3</sub> C-Fe@NC                               | 340                                             | 43                                     | <i>Small</i> , 2020, 16, 1906057.                     |
| Co@Co <sub>3</sub> O <sub>4</sub> /N-C                       | 390                                             | 88                                     | <i>Chem. Commun.</i> , 2018, 54, 12746.               |
